# Supplementary material for: Nonlinear Multivariate Regression Algorithms for Improving Precision of Multisensor Potentiometry in Analysis of Spent Nuclear Fuel Reprocessing Solutions
Source: MDPI journal article supplement (doi:10.3390/chemosensors10030090), 2022-02-25
Supplement: s1 [file s1]

# Nonlinear Multivariate Regression Algorithms for Improving Precision of Multisensor Potentiometry in Analysis of Spent Nuclear Fuel Reprocessing Solutions

Nadan Kravić <sup>1</sup>, Julia Savosina <sup>2</sup>, Maria Agafonova-Moroz <sup>2</sup>, Vasily Babain <sup>1</sup>, Andrey Legin <sup>1,3</sup>, Dmitry Kirsanov <sup>1,3,\*</sup>

<sup>1</sup> Institute of Chemistry, Saint Petersburg State University, 198504 Saint Petersburg, Russia

<sup>2</sup> Khlopin Radium Institute, 194021 Saint Petersburg, Russia

<sup>3</sup> ITMO University, 197101 Saint Petersburg, Russia

\* Correspondence: d.kirsanov@gmail.com

## SUPPLEMENTARY MATERIAL

**Table S1.** Sensor membrane composition

| Sensor | Ligand                                                                                          | Cation exchanger |
|--------|-------------------------------------------------------------------------------------------------|------------------|
| S1     | N,N',N,N'- Tetraisobutyl diamide of dipicolinic acid                                            | KTFPB            |
| S2     | 1,9-Bis-(diphenylcarbamoyl)-2,5,8-trioxanonane                                                  | CCD              |
| S3     | Tetraphenylmethylene diphosphine dioxide                                                        | KTFPB            |
| S4     | N,N,N',N'-Tetraoctyldiamide of diglycolic acid                                                  | CCD              |
| S5     | N,N'-Dimethyl-N,N'-dicyclo-hexyldiamide of dipicolinic acid                                     | KTFPB            |
| S6     | 1,9-Bis-(diphenylphosphynyl) 3,6-dibenzo-2,8-dioxa-5-methyl-phosphineoxanonane                  | KTFPB            |
| S7     | 5,11,17,23-Tetra(diethylcarbamoyl-ethoxymethylcarboxamido)-25,26,27,28-tetrapropoxycalix[4]aren | CCD              |
| S8     | Phenylloctyl-N,N-di-i-butylcarbamoyl-methylen phosphineoxide                                    | CCD              |

|     |                                                                            |       |
|-----|----------------------------------------------------------------------------|-------|
| S9  | Pyridine-2,6-dicarboxylic acid bis(1,2,3,4-tetrahydroquinolide)            | KTFPB |
| S10 | N,N'-diethyl-N,N'-diphenyldiamide of 2,2'-dipyridyl-6,6'-dicarboxylic acid | KTFPB |
| S11 | N,N'-Diethyl-N,N'-di(p-fluoro)phenyl diamide of dipicolinic acid           | KTFPB |
| S12 | 1,6-Bis-(benzylphenylcarbamoyl)-3-benzo-2,5-oxahexane                      | KTFPB |
| S13 | N, N'-Diethyl-N, N'-di-p-tolyldiamide of dipicolinic acid                  | KTFPB |
| S14 | Diphenyl-N,N-di-n-butylcarbamoyl-methylphosphin oxide                      | CCD   |
| S15 | 1,18-Bis-(diphenylphosphynyl)<br>2,5,8,11,14,17-hexaoxaoctadecane          | CCD   |
| S16 | 1,9-Bis-(diphenylphosphynyl)-<br>2,5,8-trioxanonane                        | CCD   |
| S17 | N2,N2,N9,N9-Tetrabutyl -1,10- phenanthroline-2,9-dicarboxamide             | KTFPB |

**Table S2.** Elemental composition of the samples taken from the pilot extraction unit.

| Sample    | La    | Ce    | Pr  | Nd   | Sm  | Eu  | Zr     | Mo  | Cr   | Mg   | Mn   | Ca    | Na      | K    | Ni    | U    | Y   | Zn   | Ru   | Fe     | Cm   | Am  |
|-----------|-------|-------|-----|------|-----|-----|--------|-----|------|------|------|-------|---------|------|-------|------|-----|------|------|--------|------|-----|
| <b>b1</b> | 0.1   | 0.1   | 0.1 | 10.1 | 2.6 | 0.1 | 2.3    | 2.5 | 28.0 | 73.3 | 38.1 | 80.9  | 3968.0  | 17.6 | 213.1 | 11.2 | 0.0 | 10.5 | 50.6 | 4477.2 | -    | 0.3 |
| <b>b2</b> | 0.1   | 0.1   | 0.1 | 4.9  | 2.6 | 0.1 | 17.5   | 1.8 | 24.9 | 68.0 | 35.0 | 131.9 | 3572.0  | 23.3 | 204.3 | 8.4  | 0.0 | 9.7  | 47.6 | 4201.0 | -    | 0.2 |
| <b>b3</b> | 1.3   | 0.6   | 0.1 | 4.7  | 2.6 | 0.1 | 46.7   | 2.1 | 26.7 | 72.0 | 37.5 | 305.8 | 3314.1  | 19.6 | 210.6 | 10.0 | 0.5 | 10.0 | 50.9 | 4409.8 | 0.00 | 0.2 |
| <b>b4</b> | 16.4  | 3.9   | 1.8 | 8.7  | 1.4 | 0.1 | 90.9   | 2.3 | 24.7 | 66.9 | 34.0 | 469.5 | 3797.6  | 18.2 | 192.8 | 8.1  | 0.0 | 9.9  | 46.3 | 4007.9 | 0.00 | 0.2 |
| <b>b5</b> | 79.8  | 17.3  | 2.4 | 4.3  | 1.2 | 0.1 | 376.5  | 2.2 | 17.3 | 52.2 | 21.9 | 430.3 | 8319.2  | 30.5 | 126.2 | 10.8 | 0.0 | 8.0  | 32.8 | 2510.0 | 0.00 | 0.4 |
| <b>b6</b> | 209.1 | 104.5 | 2.3 | 8.6  | 2.0 | 0.1 | 1103.3 | 2.1 | 6.1  | 34.9 | 7.0  | 240.9 | 13977.9 | 45.6 | 39.7  | 54.4 | 0.1 | 7.8  | 16.6 | 760.9  | 0.02 | 0.8 |
| <b>b7</b> | 0.3   | 0.7   | 0.1 | 2.3  | 2.8 | 0.3 | 6.8    | 0.9 | 1.0  | 28.2 | 0.2  | 62.2  | 87.5    | 10.9 | 5.9   | 4.6  | 0.0 | 8.0  | 1.1  | 9.7    | 0.00 | 0.5 |
| <b>b8</b> | 0.8   | 2.7   | 1.6 | 2.4  | 2.9 | 0.1 | 11.2   | 0.6 | 1.2  | 27.1 | 0.3  | 60.8  | 63.0    | 14.6 | 0.9   | 11.9 | 0.0 | 7.8  | 1.1  | 1.2    | 0.01 | 0.9 |
| <b>b9</b> | 12.6  | 31.0  | 1.8 | 11.0 | 1.7 | 0.1 | 16.4   | 0.6 | 1.5  | 28.2 | 0.2  | 66.9  | 50.6    | 10.5 | 1.3   | 67.8 | 0.1 | 9.0  | 0.9  | 0.5    | 0.11 | 1.3 |

|            |      |      |      |       |       |      |      |     |     |      |     |      |      |      |     |       |     |      |     |      |       |      |
|------------|------|------|------|-------|-------|------|------|-----|-----|------|-----|------|------|------|-----|-------|-----|------|-----|------|-------|------|
| <b>b10</b> | 16.2 | 40.6 | 2.5  | 14.3  | 1.8   | 0.1  | 11.3 | 0.6 | 1.2 | 27.1 | 0.2 | 63.4 | 48.8 | 9.5  | 2.0 | 75.9  | 0.2 | 7.3  | 1.1 | 0.0  | 0.15  | 1.3  |
| <b>b11</b> | 11.2 | 29.4 | 3.1  | 11.7  | 1.9   | 0.1  | 1.4  | 0.7 | 1.1 | 27.4 | 0.4 | 65.9 | 45.8 | 11.3 | 1.5 | 47.2  | 0.1 | 7.0  | 1.6 | 0.0  | 0.11  | 0.9  |
| <b>b12</b> | 0.1  | 2.6  | 0.1  | 2.1   | 3.6   | 0.3  | 74.3 | 1.1 | 2.1 | 27.5 | 0.2 | 60.9 | 64.6 | 11.0 | 1.9 | 435.3 | 0.1 | 7.6  | 3.2 | 12.0 | 6.34  | 28.4 |
| <b>b13</b> | 0.1  | 3.9  | 0.1  | 3.5   | 7.3   | 0.8  | 69.2 | 1.2 | 1.7 | 27.6 | 0.3 | 61.1 | 47.9 | 13.5 | 1.2 | 589.3 | 0.0 | 8.3  | 4.0 | 8.8  | 13.02 | 33.8 |
| <b>b14</b> | 0.8  | 6.1  | 1.1  | 17.3  | 18.0  | 2.1  | 70.0 | 1.0 | 1.7 | 28.4 | 0.3 | 62.2 | 49.2 | 7.7  | 1.1 | 680.2 | 0.5 | 10.0 | 3.0 | 7.1  | 15.02 | 39.2 |
| <b>b15</b> | 12.3 | 56.0 | 10.6 | 72.7  | 39.2  | 5.3  | 92.3 | 1.4 | 1.5 | 27.9 | 0.3 | 63.5 | 48.0 | 12.0 | 1.0 | 741.7 | 3.2 | 8.4  | 4.9 | 6.8  | 9.01  | 44.7 |
| <b>b16</b> | 10.5 | 49.6 | 11.3 | 84.7  | 49.0  | 6.7  | 23.5 | 1.4 | 2.1 | 28.1 | 0.2 | 64.2 | 48.1 | 14.7 | 0.9 | 524.5 | 4.1 | 8.1  | 2.0 | 6.4  | 11.01 | 36.5 |
| <b>b17</b> | 11.9 | 55.9 | 14.3 | 100.7 | 62.1  | 8.9  | 9.5  | 1.8 | 1.7 | 27.9 | 0.2 | 65.7 | 47.0 | 12.2 | 1.6 | 416.3 | 4.9 | 8.9  | 1.6 | 6.6  | 11.68 | 28.4 |
| <b>b18</b> | 16.5 | 70.7 | 20.8 | 145.5 | 83.1  | 11.9 | 5.1  | 2.2 | 1.6 | 27.9 | 0.4 | 64.5 | 47.4 | 10.2 | 0.0 | 330.0 | 6.2 | 7.5  | 0.7 | 6.5  | 2.14  | 21.7 |
| <b>b19</b> | 18.4 | 80.9 | 23.3 | 158.9 | 93.7  | 13.1 | 3.4  | 2.3 | 1.5 | 27.1 | 0.2 | 65.8 | 48.8 | 10.1 | 1.7 | 229.8 | 6.9 | 7.4  | 1.7 | 6.3  | 4.34  | 17.6 |
| <b>b20</b> | 18.6 | 79.4 | 23.1 | 162.0 | 97.3  | 13.9 | 3.9  | 2.4 | 2.0 | 26.8 | 0.4 | 65.6 | 49.2 | 10.7 | 0.0 | 156.9 | 7.7 | 7.7  | 0.0 | 7.0  | 0.93  | 12.0 |
| <b>b21</b> | 20.0 | 84.6 | 26.7 | 181.7 | 101.6 | 14.4 | 2.3  | 2.7 | 1.6 | 27.1 | 0.3 | 66.8 | 51.4 | 9.0  | 1.2 | 112.3 | 8.5 | 7.3  | 1.4 | 7.3  | 0.37  | 9.9  |
| <b>b22</b> | 19.8 | 86.7 | 27.8 | 184.0 | 96.4  | 14.0 | 1.5  | 2.6 | 1.3 | 27.1 | 0.3 | 65.2 | 47.7 | 12.3 | 1.4 | 77.0  | 9.0 | 7.3  | 0.8 | 6.4  | 0.15  | 7.8  |
| <b>b23</b> | 14.1 | 69.5 | 23.7 | 155.9 | 70.9  | 10.2 | 1.2  | 2.1 | 1.0 | 27.0 | 0.2 | 65.7 | 48.7 | 9.3  | 0.6 | 48.1  | 8.3 | 7.1  | 0.0 | 6.2  | 0.03  | 5.7  |

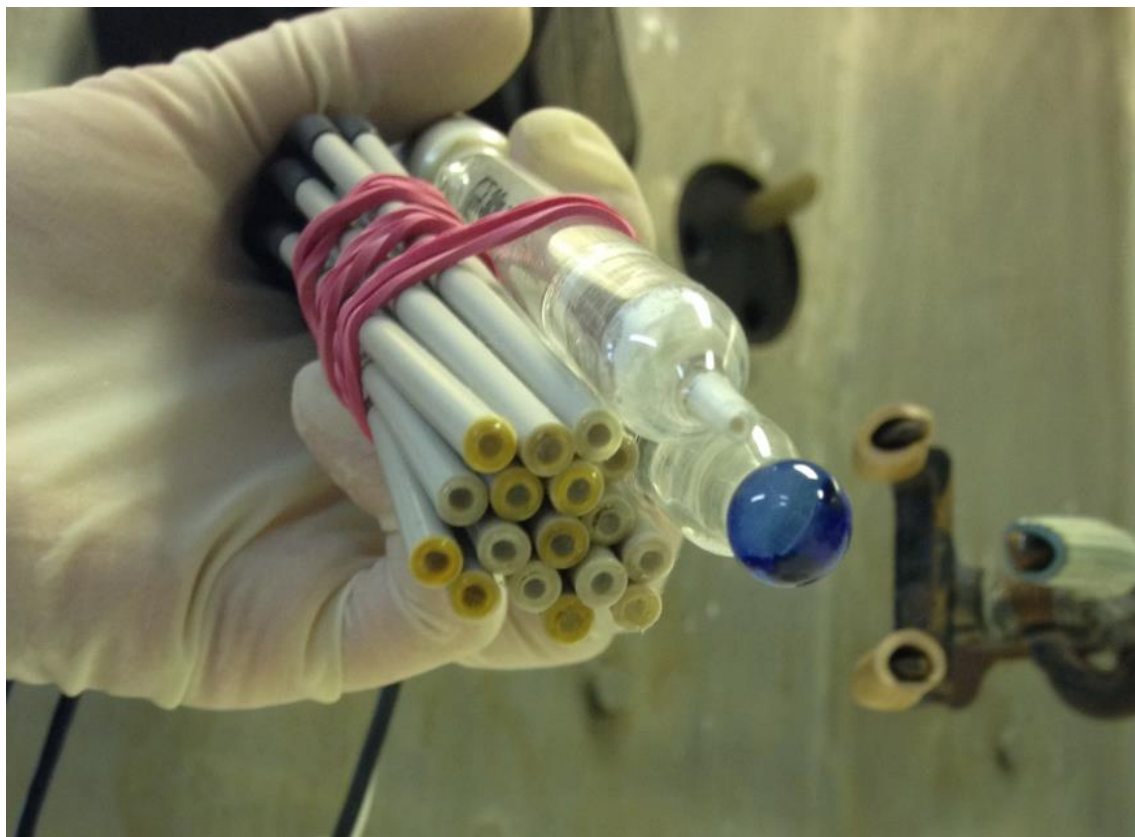

**Figure S1.** Visual appearance of the multisensor system.
